# Supplementary material for: Bullous pemphigoid in infants: characteristics, diagnosis and treatment
Source: Springer Nature journal article supplement (doi:10.1186/s13023-014-0185-6), 2014-12-01
Supplement: MOESM2 [file 9775944]

## Published cases of infantile BP

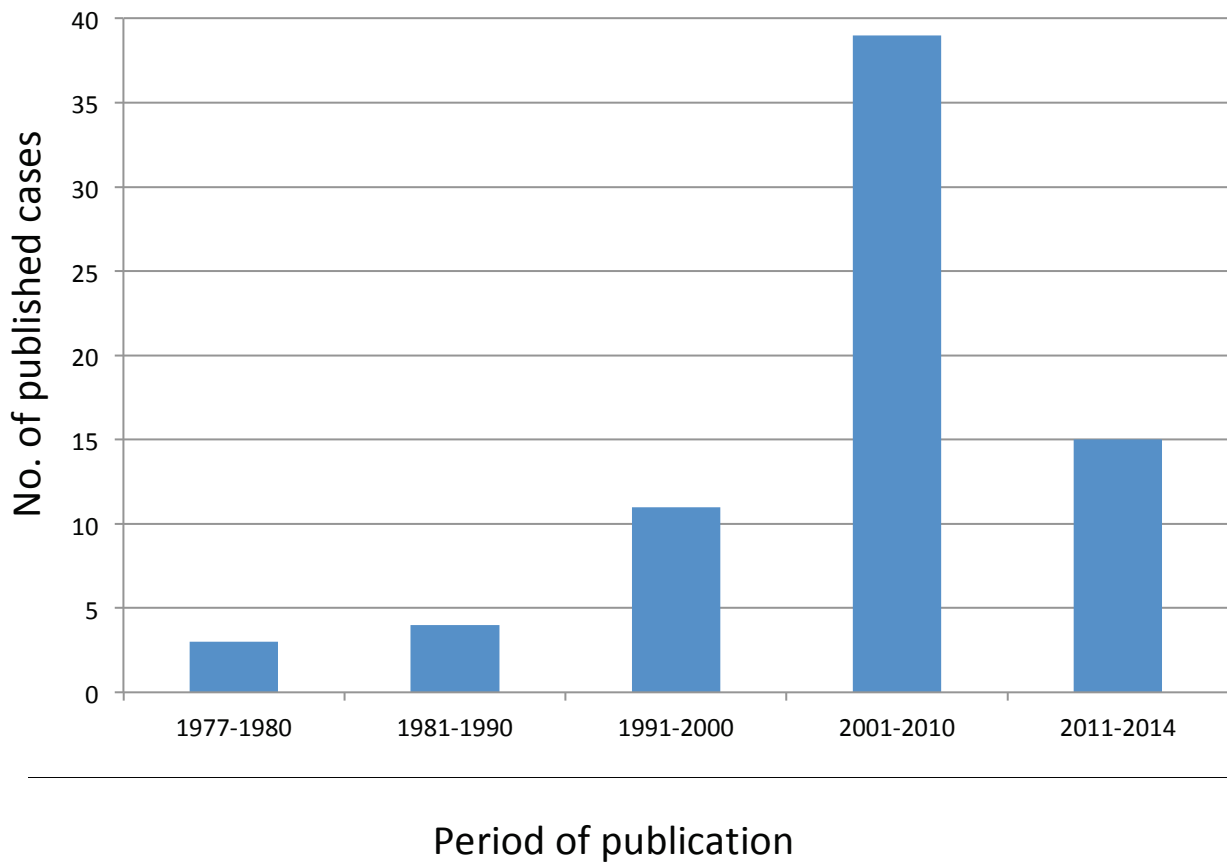

Period of publication
